# Supplementary material for: Efficient polymer solar cells based on a new benzo[1,2-b:4,5-b′]dithiophene derivative with fluorinated alkoxyphenyl side chain
Source: Royal Society of Chemistry journal article supplement (doi:10.1039/c4ta06350c), 2014-12-15
Supplement: c4ta06350c1.pdf [file c4ta06350c1.pdf]

## **Efficient polymer solar cells based on a new benzo[1,2-*b*:4,5-*b'*]dithiophene derivative with fluorinated alkoxyphenyl side chain**

Weichao Chen,<sup>a</sup> Zhengkun Du,<sup>a</sup> Liangliang Han,<sup>\*a</sup> Manjun Xiao,<sup>a</sup> Wenfei Shen,<sup>a</sup> Ting Wang,<sup>a</sup> Yuanhang Zhou,<sup>a</sup> and Renqiang Yang<sup>\*a,b</sup>

<sup>a</sup> CAS Key Laboratory of Bio-based Materials, Qingdao Institute of Bioenergy and Bioprocess Technology, Chinese Academy of Sciences, Qingdao 266101, China

<sup>b</sup> State Key Laboratory of Luminescent Materials and Devices, South China University of Technology, Guangzhou 510641, China

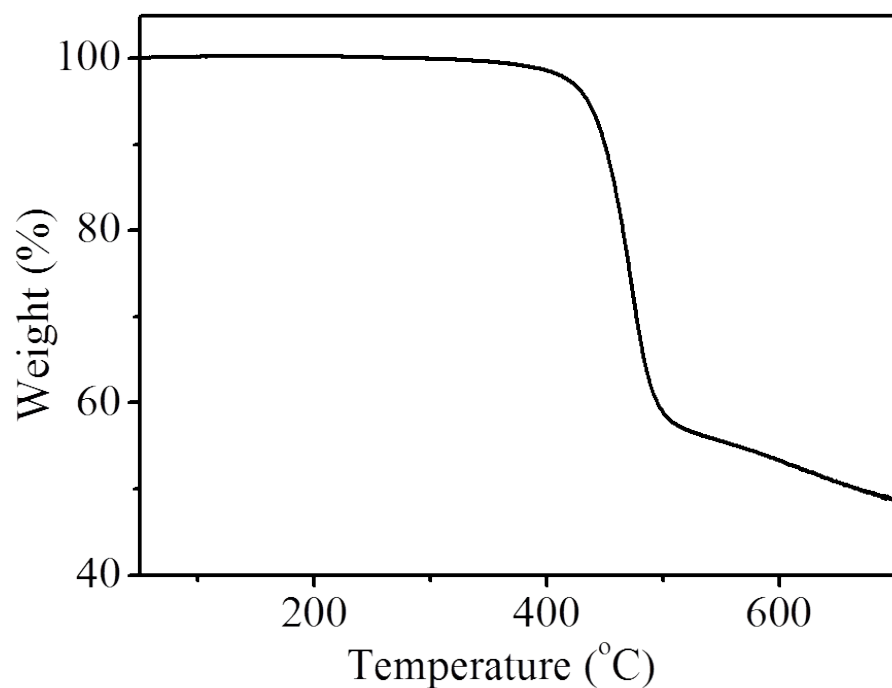

Fig. S1. TGA plot of PBDTPF-DTBT with a heating rate of  $10\text{ }^{\circ}\text{C min}^{-1}$  under inert atmosphere.

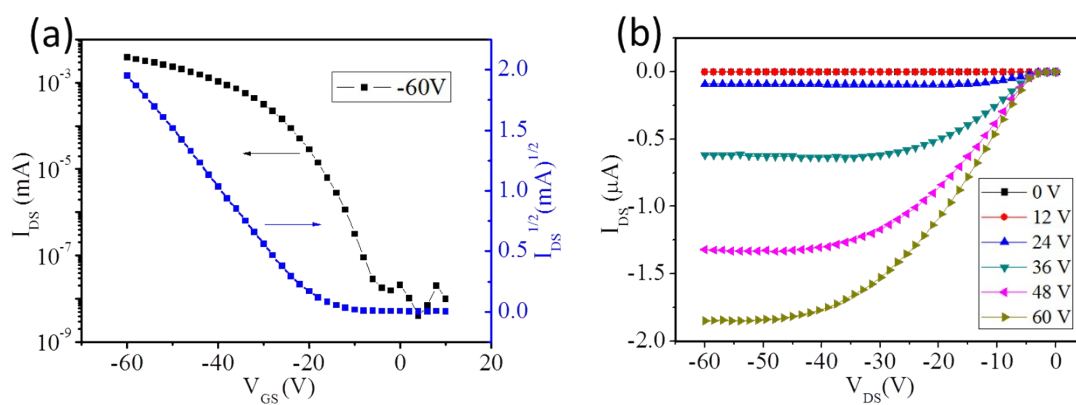

Fig. S2 (a) Transfer ( $V_{DS} = -60\text{ V}$ ) and (b) output characteristics for a typical PBDTPF-DTBT-based OTFT device.

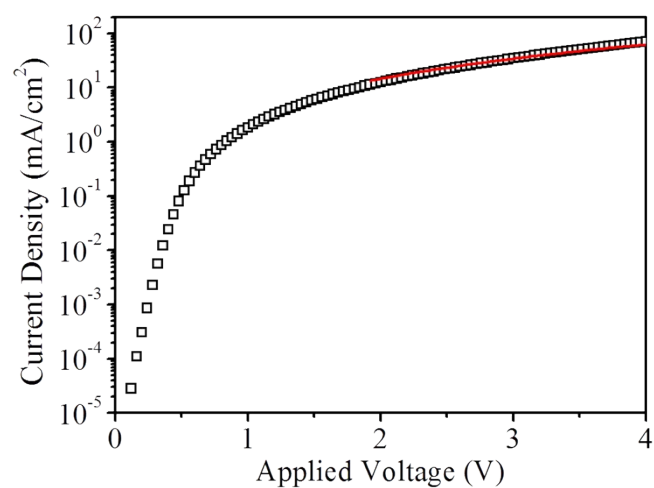

Fig. S3  $J$ - $V$  curves of vertical diode with the device structure of ITO/PEDOT:  
PSS/PBEDTPF-DTBT/Au

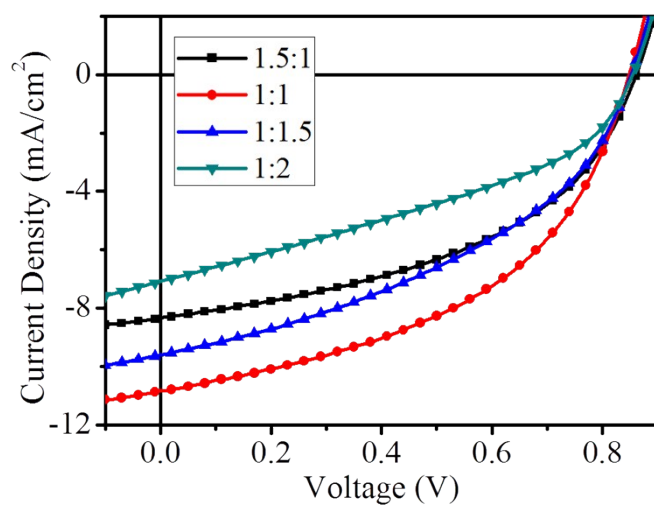

Fig. S4  $J$ - $V$  curves of devices with different ratio of PBDTPF-DTBT: PC<sub>71</sub>BM.

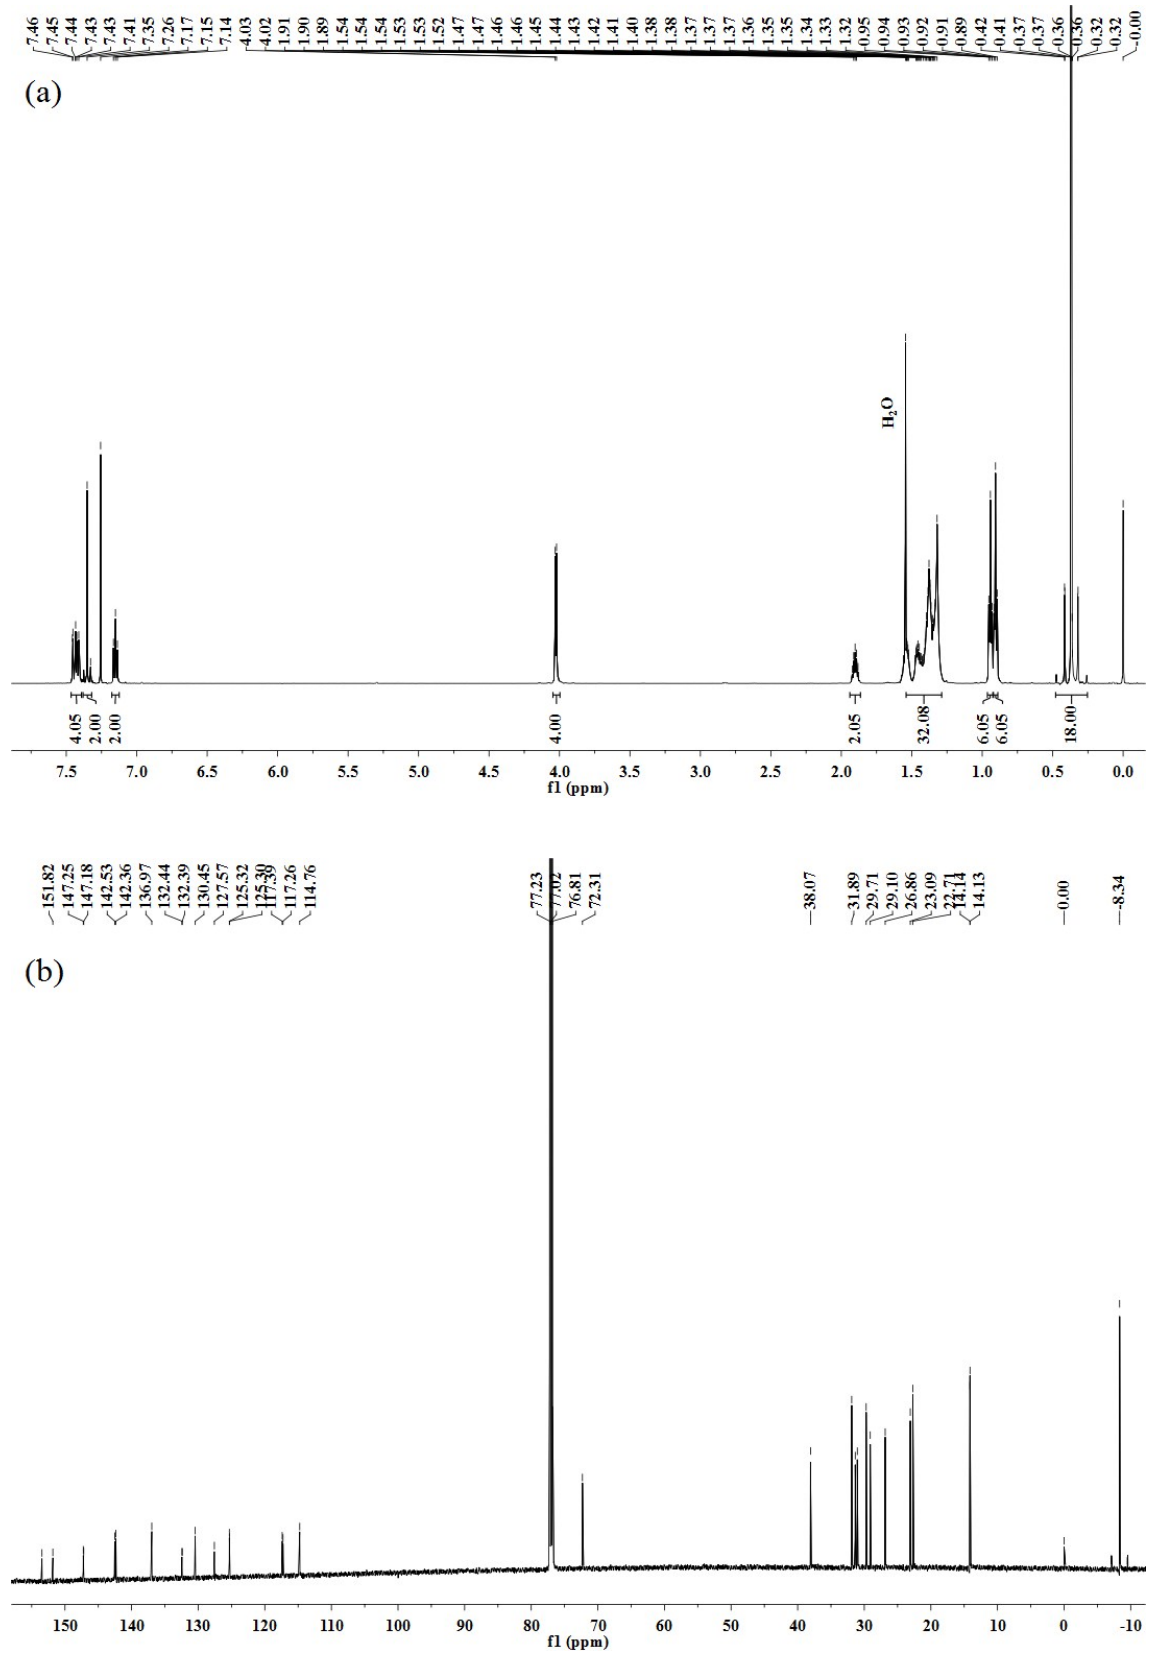

Fig. S5 (a)  $^1\text{H}$  NMR and (b)  $^{13}\text{C}$  NMR spectra of M1.
